# Supplementary material for: Adherence to standard nursing protocols on nasogastric tube feeding in a secondary referral hospital in Ghana: comparing self-ratings by professional and auxiliary nurses
Source: Springer Nature journal article supplement (doi:10.1186/s12913-019-3931-6), 2019-02-13
Supplement: MOESM1 [file 16469722]

**UNIVERSITY OF HEALTH AND ALLIED SCIENCES, HO**  
**SCHOOL OF NURSING AND MDIWIFERY**

**Research Topic:** Adherence to standard nursing protocols on nasogastric tube feeding in a secondary referral hospital in Ghana: comparing self-ratings by professional and auxiliary nurses.

**Preamble**

*This is a questionnaire developed by students of University of Health and Allied Sciences on the research topic “Adherence to standard nursing protocols on nasogastric tube feeding in a secondary referral hospital in Ghana: comparing self-ratings by professional and auxiliary nurses”. Your responses are confidential and none of your information will be communicated or shared with a third party without your prior notice and permission. Thank you.*

| <b>PART A: SOCIO-DEMOGRAPHIC CHARACTERISTICS OF RESPONDENTS</b>                 |                           |                                                         |
|---------------------------------------------------------------------------------|---------------------------|---------------------------------------------------------|
| QUESTIONS                                                                       | RESPONSES                 |                                                         |
| 1. Gender                                                                       | Male                      | <input type="checkbox"/>                                |
|                                                                                 | Female                    | <input type="checkbox"/>                                |
| 2. Age                                                                          | .....                     |                                                         |
| 3. Religion                                                                     | Christian                 | <input type="checkbox"/>                                |
|                                                                                 | Muslim                    | <input type="checkbox"/>                                |
|                                                                                 | Others                    | <input type="checkbox"/>                                |
| 4. Marital Status                                                               | Single                    | <input type="checkbox"/>                                |
|                                                                                 | Married                   | <input type="checkbox"/>                                |
|                                                                                 | Others                    | <input type="checkbox"/>                                |
| 5. Educational Level                                                            | Certificate               | <input type="checkbox"/>                                |
|                                                                                 | Diploma                   | <input type="checkbox"/>                                |
|                                                                                 | Degree                    | <input type="checkbox"/>                                |
|                                                                                 | Masters                   | <input type="checkbox"/>                                |
|                                                                                 | PhD                       | <input type="checkbox"/>                                |
| 6. Years of Working Experience                                                  | .....                     |                                                         |
| 7. Professional Category                                                        | Auxiliary Nurses          | <input type="checkbox"/>                                |
|                                                                                 | Registered General Nurses | <input type="checkbox"/>                                |
| <b>PART B: KNOWLEDGE AND PRACTICE LEVEL OF NURSES</b>                           |                           |                                                         |
| QUESTIONS                                                                       | RESPONSE                  | CODE                                                    |
| 1. Introduction and explaining of procedure is to pre-inform the client         | Strongly agree.....       | 1                                                       |
|                                                                                 | Agree.....                | 2                                                       |
|                                                                                 | Undecided.....            | 3                                                       |
|                                                                                 | Disagree.....             | 4                                                       |
|                                                                                 |                           | <input style="width: 50px; height: 30px;" type="text"/> |
| 2. Upright position during intubation of patients is done to prevent aspiration | Strongly agree.....       | 1                                                       |
|                                                                                 | Agree.....                | 2                                                       |
|                                                                                 | Undecided.....            | 3                                                       |
|                                                                                 | Disagree.....             | 4                                                       |
|                                                                                 |                           | <input style="width: 50px; height: 30px;" type="text"/> |

|                                                                                                                |                                                                          |                          |
|----------------------------------------------------------------------------------------------------------------|--------------------------------------------------------------------------|--------------------------|
| 3. Lubrication of the tip of the tube is done for easy passage and prevention of lacerations of the GIT lining | Strongly agree.....1<br>Agree.....2<br>Undecided.....3<br>Disagree.....4 | <input type="checkbox"/> |
| 4. Patient mouth is checked while passing tube to observe coiling of the tube in the mouth                     | Strongly agree.....1<br>Agree.....2<br>Undecided.....3<br>Disagree.....4 | <input type="checkbox"/> |
| 5. Aspirating of the gastric content is a confirmatory method used to check for the position of tube.          | Strongly agree.....1<br>Agree.....2<br>Undecided.....3<br>Disagree.....4 | <input type="checkbox"/> |
| 6. Kinking tube while feeding is done by pinching                                                              | Strongly agree.....1<br>Agree.....2<br>Undecided.....3<br>Disagree.....4 | <input type="checkbox"/> |
| 7. Amount of water used to flush the tube before and after feeding is 10mls-15mls                              | Strongly agree.....1<br>Agree.....2<br>Undecided.....3<br>Disagree.....4 | <input type="checkbox"/> |
| 8. Checking the temperature of the feed is done to prevent irritation of the GIT                               | Strongly agree.....1<br>Agree.....2<br>Undecided.....3<br>Disagree.....4 | <input type="checkbox"/> |
| 9. The tube is spigot immediately after feeding to prevent abdominal distention                                | Strongly agree.....1<br>Agree.....2<br>Undecided.....3<br>Disagree.....4 | <input type="checkbox"/> |
| 10. The syringe for feeding is raised to allow the feed run slowly under gravity                               | Strongly agree.....1<br>Agree.....2<br>Undecided.....3<br>Disagree.....4 | <input type="checkbox"/> |

**PART C: BARRIERS TO STANDARD PRACTICE**

| QUESTIONS                                                    | RESPONSE                                                     | CODE                     |
|--------------------------------------------------------------|--------------------------------------------------------------|--------------------------|
| 1. Is there a general standard protocol for NG tube feeding? | Yes .....1<br>No .....2<br>If YES, please answer question 2. | <input type="checkbox"/> |
| 2. Is the protocol available on the ward?                    | Yes .....1<br>No .....2                                      | <input type="checkbox"/> |
| 3. Are there adequate number of staff on a shift?            | Yes .....1<br>No .....2                                      | <input type="checkbox"/> |

|                                                                                                         |                                                                                         |                          |
|---------------------------------------------------------------------------------------------------------|-----------------------------------------------------------------------------------------|--------------------------|
| 4. If NO to question 3, to what extent does it affect the management of patient on NGT                  | Very large extent.....1<br>Large extent.....2<br>Undecided.....3<br>Little extent.....4 | <input type="checkbox"/> |
| 5. Are there adequate number of NG tubes on the ward?                                                   | Yes .....1<br>No .....2                                                                 | <input type="checkbox"/> |
| 6. If NO to question 5, to what extent does it affect the management of patient on NGT?                 | Very large extent.....1<br>Large extent.....2<br>Undecided.....3<br>Little extent.....4 | <input type="checkbox"/> |
| 7. Do relatives oppose the use of NG tube?                                                              | Yes .....1<br>No .....2                                                                 | <input type="checkbox"/> |
| 8. If YES to question 7, to what extent does it affect the management of patient on NGT?                | Very large extent.....1<br>Large extent.....2<br>Undecided.....3<br>Little extent.....4 | <input type="checkbox"/> |
| 9. Have you ever nursed a patient on NG tube in the last six months                                     | Yes .....1<br>No .....2                                                                 | <input type="checkbox"/> |
| 10. Have you attended a workshop on the management of patient on NG tube in the last six months?        | Yes .....1<br>No .....2                                                                 | <input type="checkbox"/> |
| 11. If YES to question 10, who organized the workshop?                                                  | The Hospital.....1<br>NGO.....2<br>Others (please specify).....3                        | <input type="checkbox"/> |
| 12. Have you had any continuous education on the management of patient on NG tube in the last one year? | Yes .....1<br>No .....2                                                                 | <input type="checkbox"/> |

**THANK YOU FOR YOUR TIME**
